# Supplementary material for: Daytime and nighttime aerosol soluble iron formation in clean and slightly polluted moist air in a coastal city in eastern China
Source: Copernicus journal article supplement (doi:10.5194/acp-24-6495-2024), 2024-06-04
Supplement: Supplementary file 1 [file acp-24-6495-2024-supplement.pdf]

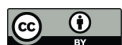

*Supplement of*

## **Daytime and nighttime aerosol soluble iron formation in clean and slightly polluted moist air in a coastal city in eastern China**

**Wenshuai Li et al.**

*Correspondence to:* Daizhou Zhang (dzzhang@pu-kumamoto.ac.jp) and Yang Zhou (yangzhou@ouc.edu.cn)

The copyright of individual parts of the supplement might differ from the article licence.

## 1 **S1. The influence of organic matters on aerosol pH**

2 We utilized the same method of Guo et al. (2015) to calculate ALWC<sub>org</sub> as the following equation:

$$3 \quad \text{ALWC}_{\text{org}} = \frac{m_{\text{org}} \rho_{\text{w}}}{\rho_{\text{org}}} \frac{\kappa_{\text{org}}}{\left(\frac{100\%}{\text{RH}} - 1\right)}$$

4 where  $m_{\text{org}}$  is the OM concentration, which was estimated with 1.6 times OC (Turpin and Lim, 2001),  $\rho_{\text{w}}$   
5 is water density ( $1.0 \times 10^3 \text{ kg m}^{-3}$ ), and a typical organic density ( $\rho_{\text{org}}$ ) of  $1.4 \times 10^3 \text{ kg m}^{-3}$  was used.  $\kappa_{\text{org}}$  is  
6 the hygroscopicity parameter of organic aerosol compositions. We did not observe  $\kappa_{\text{org}}$  during the  
7 campaign, so we applied a typical range of 0.05–0.20 (Kuang et al., 2020). In Beijing, the typical  $\kappa_{\text{org}}$  of  
8 0.06 was used in previous studies (Cheng et al., 2016). The higher the  $\kappa_{\text{org}}$  is, the larger the ALWC<sub>org</sub>  
9 would be. At last, we evaluated the range of ALWC<sub>org</sub> as 0.83–3.31  $\mu\text{g m}^{-3}$ , which only accounted for  
10 2.6–9.8% of the total ALWC. pH was about 2.49 without considering OM, and it was 2.52–2.57 when  
11 considering OM, indicating that the influence of OM in aerosol pH was very weak.

12

### 13 **Reference:**

- 14 Cheng, Y. F., Zheng, G. J., Wei, C., Mu, Q., Zheng, B., Wang, Z. B., Gao, M., Zhang, Q., He, K. B.,  
15 Carmichael, G., Poschl, U., and Su, H.: Reactive nitrogen chemistry in aerosol water as a source of  
16 sulfate during haze events in China, *Sci. Adv.*, 2, 11, 10.1126/sciadv.1601530, 2016. Guo, H., Xu, L.,  
17 Bougiatioti, A., Cerully, K. M., Capps, S. L., Hite Jr, J. R., Carlton, A. G., Lee, S. H., Bergin, M. H.,  
18 Ng, N. L., Nenes, A., and Weber, R. J.: Fine-particle water and pH in the southeastern United States,  
19 *Atmos. Chem. Phys.*, 15, 5211–5228, 10.5194/acp-15-5211-2015, 2015.
- 20 Guo, H., Xu, L., Bougiatioti, A., Cerully, K. M., Capps, S. L., Hite Jr, J. R., Carlton, A. G., Lee, S. H.,  
21 Bergin, M. H., Ng, N. L., Nenes, A., and Weber, R. J.: Fine-particle water and pH in the southeastern  
22 United States, *Atmos. Chem. Phys.*, 15, 5211–5228, <https://doi.org/10.5194/acp-15-5211-2015>, 2015.
- 23 Kuang, Y., Xu, W., Tao, J., Ma, N., Zhao, C., and Shao, M.: A Review on Laboratory Studies and Field  
24 Measurements of Atmospheric Organic Aerosol Hygroscopicity and Its Parameterization Based on  
25 Oxidation Levels, *Current Pollution Reports*, 6, 410–424, 10.1007/s40726-020-00164-2, 2020.
- 26 Turpin, B. J. and Lim, H.-J.: Species Contributions to PM<sub>2.5</sub> Mass Concentrations: Revisiting Common  
27 Assumptions for Estimating Organic Mass, *Aerosol Science and Technology*, 35, 602–610,  
28 10.1080/02786820119445, 2001.

29 **Table S1: Detection limits of the analysis instruments (unit:  $\mu\text{g L}^{-1}$  for WSIs and elements, and  $\mu\text{g}$**   
 30 **for OC and EC).**

| Species                                     | DL <sub>j</sub> | Species | DL <sub>j</sub> |
|---------------------------------------------|-----------------|---------|-----------------|
| Na <sup>+</sup>                             | 20.0            | V       | 0.0030          |
| NH <sub>4</sub> <sup>+</sup>                | 20.0            | Cr      | 0.0025          |
| K <sup>+</sup>                              | 10.0            | Mn      | 0.0055          |
| Mg <sup>2+</sup>                            | 10.0            | Fe      | 0.0139          |
| Ca <sup>2+</sup>                            | 20.0            | Ni      | 0.0287          |
| F <sup>-</sup>                              | 10.0            | Cu      | 0.0060          |
| Cl <sup>-</sup>                             | 40.0            | Zn      | 0.0770          |
| NO <sub>3</sub> <sup>-</sup>                | 10.0            | As      | 0.0151          |
| SO <sub>4</sub> <sup>2-</sup>               | 10.0            | Se      | 0.4062          |
| C <sub>2</sub> O <sub>4</sub> <sup>2-</sup> | 10.0            | Rb      | 0.0020          |
| OC                                          | 0.20            | Sr      | 0.0054          |
| EC                                          | 0.20            | Cd      | 0.0030          |
| Al                                          | 0.0454          | Ba      | 0.0022          |
| Mg                                          | 0.0754          | Pb      | 0.0026          |

31

32

33

**Table S2: Classification results of aerosol samples.**

| Sample Types                      | Sample Number |
|-----------------------------------|---------------|
| Clean Periods Samples             | 19            |
| Slightly-polluted Periods Samples | 32            |
| Heavily-polluted Periods Samples  | 6             |
| Fog-impacted Samples              | 12            |
| Dust-related Samples              | 70            |
| Total                             | 139           |

34

35

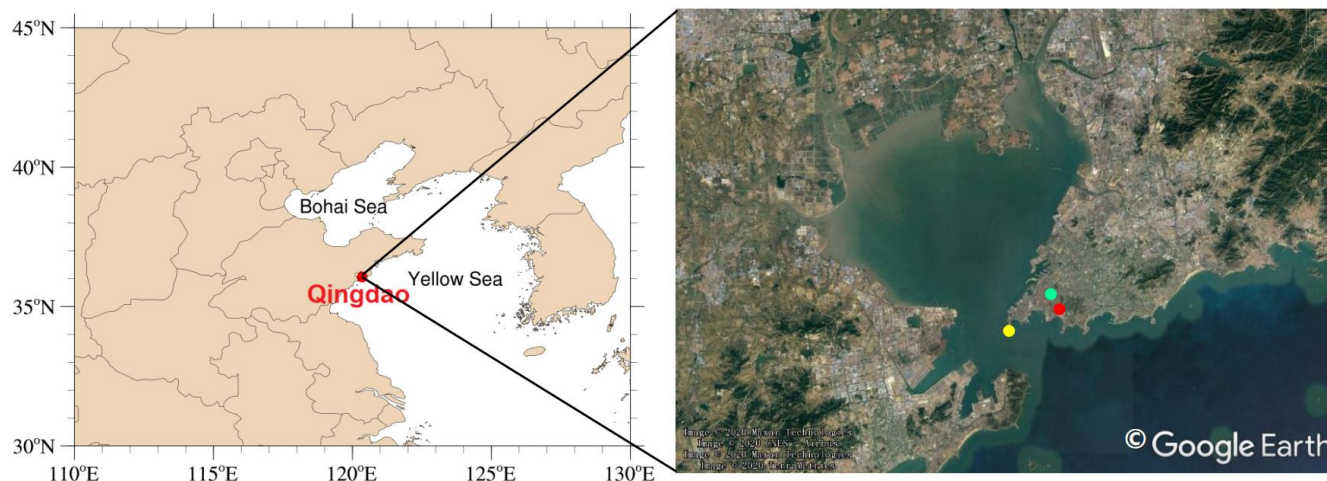

36 **Figure S1: Location of the sampling site. In the right panel, the red dot shows the location of the**  
37 **sampling site. The green dot shows the location of Qingdao Meteorological Bureau. The yellow dot**  
38 **shows the location of the air quality monitoring station in Qingdao (the west sub-station of the**  
39 **Shinan District).**

40

41

42

43

44

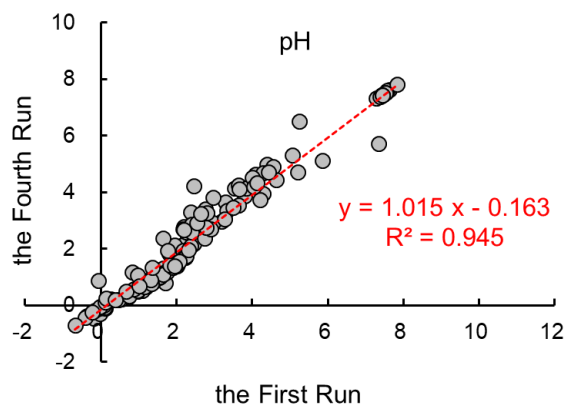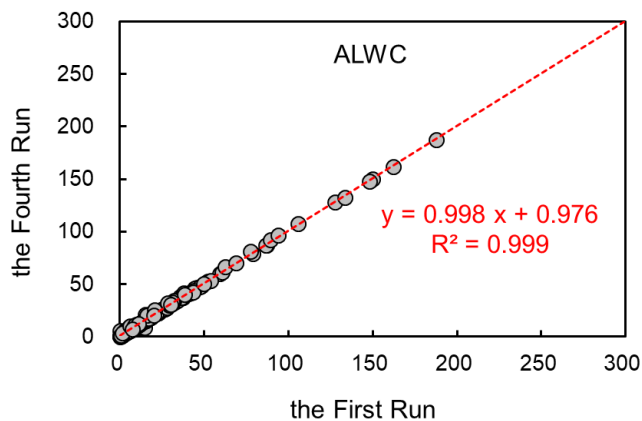

45

46 **Figure S2: Relationships of aerosol pH and ALWC between the first run and the fourth run of**  
 47 **ISORROPIA calculation.**

48

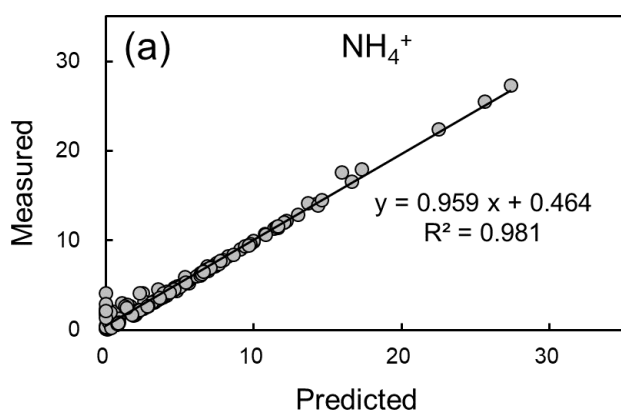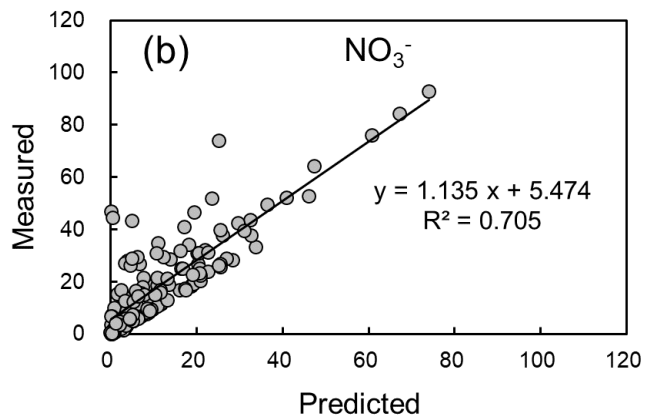

49

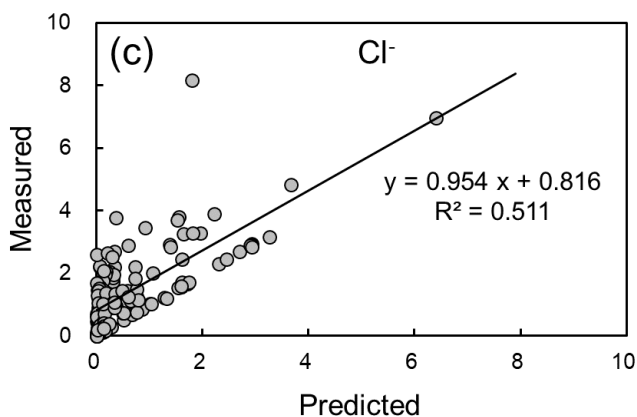

50

51 **Figure S3: Intercomparisons of simulated and measured concentrations of  $\text{NO}_3^-$ ,  $\text{NH}_4^+$  and  $\text{Cl}^-$ .**

52

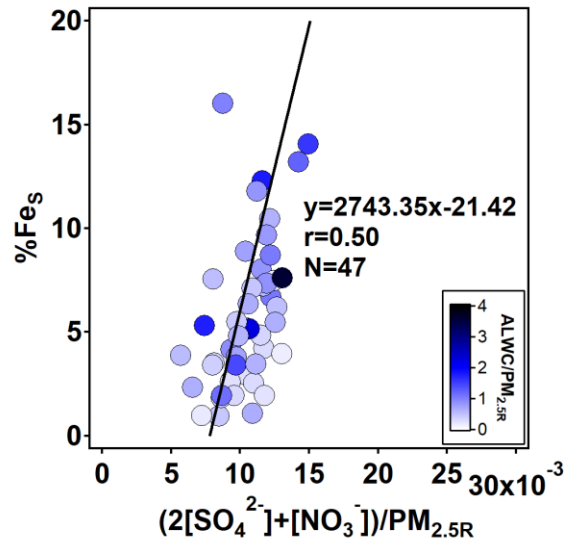

53

54

Figure S4: Same as Figure 3c in the manuscript but only for clean and SP periods.

55

56

57

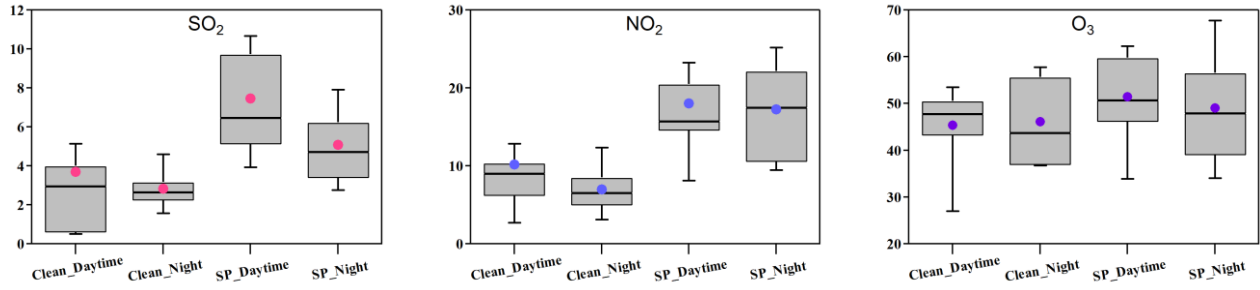

58

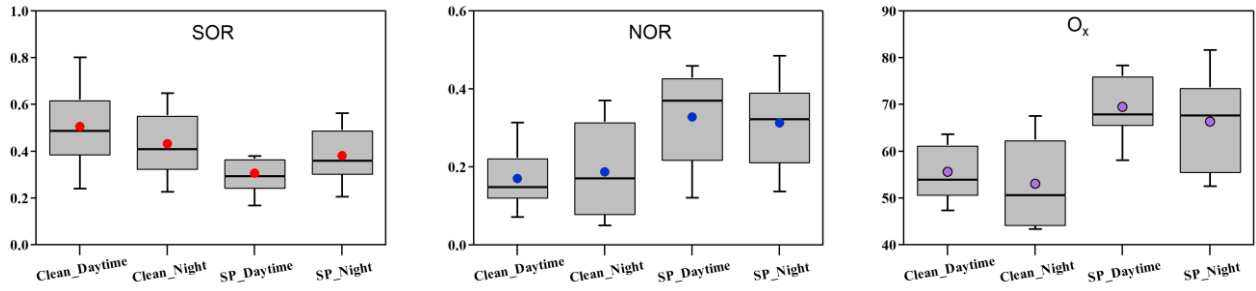

59

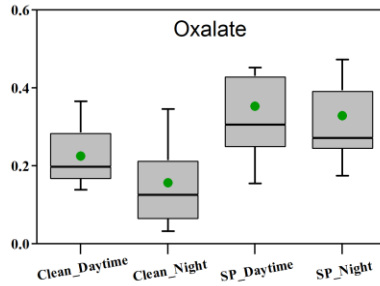

60 **Figure S5: Box plots of several chemical parameters. Boxes represent the 25<sup>th</sup>, 50<sup>th</sup> and 75<sup>th</sup>**  
61 **percentiles. Error bars represent 10<sup>th</sup> and 90<sup>th</sup> percentiles. The dots within the boxes represent the**  
62 **arithmetic means.**

63

64

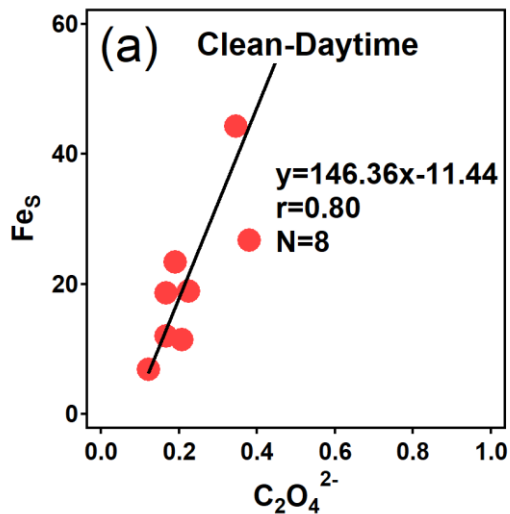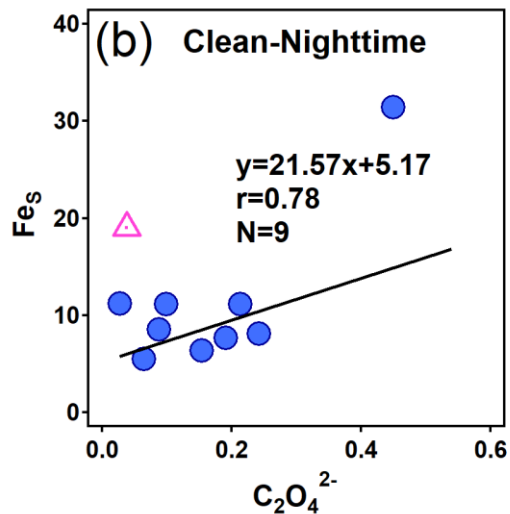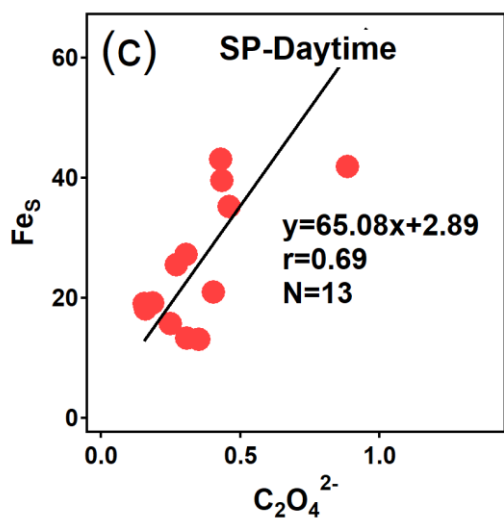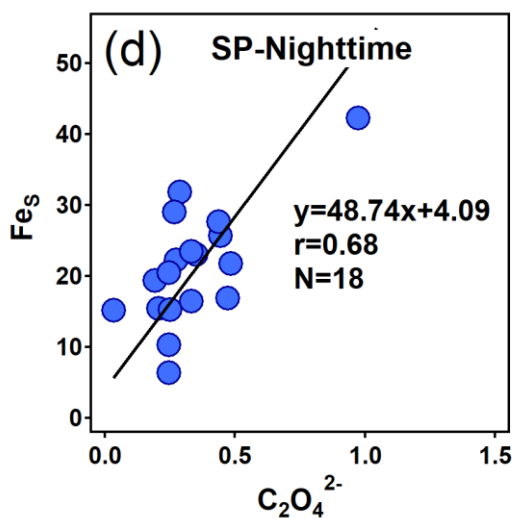

65

66

67 **Figure S6: Relationships between soluble Fe ( $Fe_s$ , unit:  $ng\ m^{-3}$ ) and oxalate (unit:  $\mu g\ m^{-3}$ ). An**  
 68 **extreme point (marked by a pink triangle,  $\%Fe_s = 37.2\%$ ) in (b) was removed to obtain the more**  
 69 **robust correlation coefficient.**

70

71



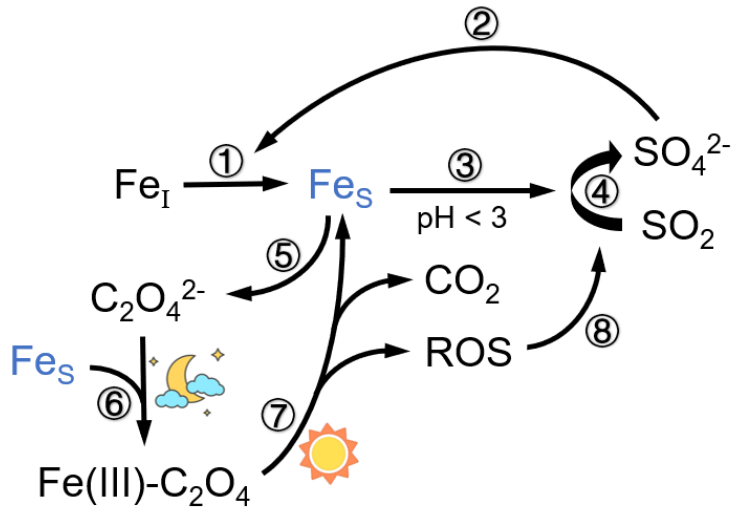

- ① Dissolution of insoluble Fe ( $Fe_I$ )
- ② Acid Process
- ③ Fe-promoted catalysis
- ④ Sulfate formation
- ⑤ Oxalate formation catalyzed by Fe
- ⑥ Stabilization of  $Fe_S$  at night
- ⑦ Photolysis process
- ⑧  $SO_2$  oxidation by ROS

72

73 **Figure S7: Conceptual diagram showing the Fe dissolution influenced by acid processes and**  
 74 **oxalate.**
